# Supplementary material for: Bioinspired polyethylene terephthalate nanocone arrays with underwater superoleophobicity and anti-bioadhesion properties
Source: Royal Society of Chemistry journal article supplement (doi:10.1039/c4nr04471a), 2014-01-01
Supplement: c4nr04471a1.pdf [file c4nr04471a1.pdf]

# Bioinspired polyethylene terephthalate nanocone arrays with underwater superoleophobicity and anti-bioadhesion properties

*Wendong Liu,<sup>a</sup> Xueyao Liu,<sup>a</sup> Jiaozi Fangteng,<sup>b</sup> Shuli Wang,<sup>a</sup> Liping Fang,<sup>a</sup> Huaizhong Shen,<sup>a</sup>*

*Siyuan Xiang,<sup>a</sup> Hongchen Sun,<sup>b</sup> and Bai Yang<sup>\*a</sup>*

<sup>a</sup> State Key Laboratory of Supramolecular Structure and Materials, College of Chemistry, Jilin University, Changchun 130012, People's Republic of China.

<sup>b</sup> School of Stomatology, Jilin University, Changchun 130041, People's Republic of China.

The author to whom correspondence should be addressed. E-mail: [byangchem@jlu.edu.cn](mailto:byangchem@jlu.edu.cn),

Fax: +86 431 85193423.

- 1. Figure S1.** The optical microscopy image of the self assembled 2D PS microspheres over a large area, the diameter of the PS microsphere is 580 nm.
- 2. Figure S2.** The top-view SEM image of the PET nanocone arrays over a large area, the aspect ratio of the nanocone is 6.
- 3. Figure S3.** The SEM image of the PET nanocone arrays obtained after 30 min etching.
- 4. Figure S4.** The optical image of the water droplet on the PET nanocone arrays with the aspect ratio of 6.
- 5. Figure S5.** The schematic illustration of the nanocone arrays modification with PNIPAAm.
- 6. Figure S6.** High resolution XPS spectra of the PNIPAAm modified PET nanocone arrays.

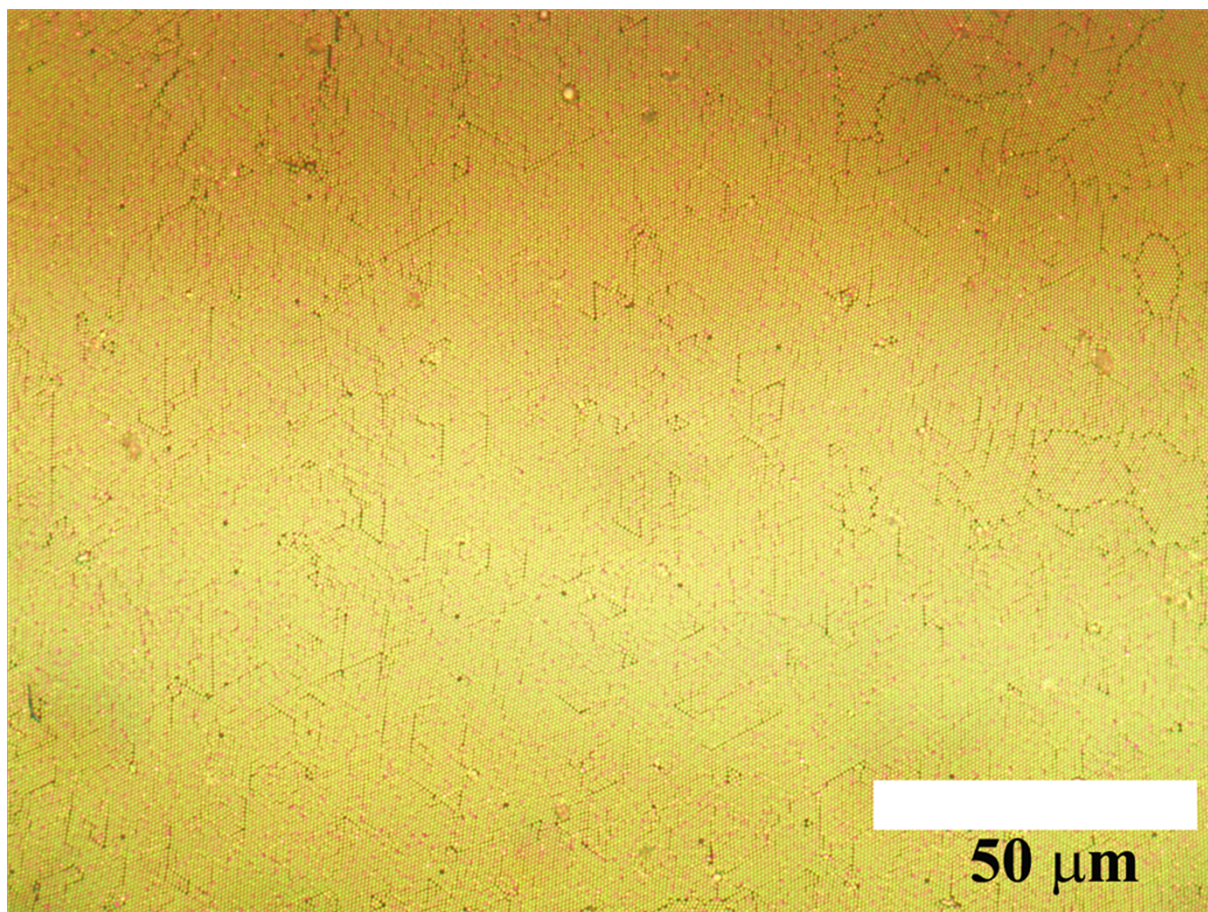

**Figure S1.** The optical microscopy image of the self assembled 2D PS microspheres over a large area, the diameter of the PS microsphere is 580 nm.

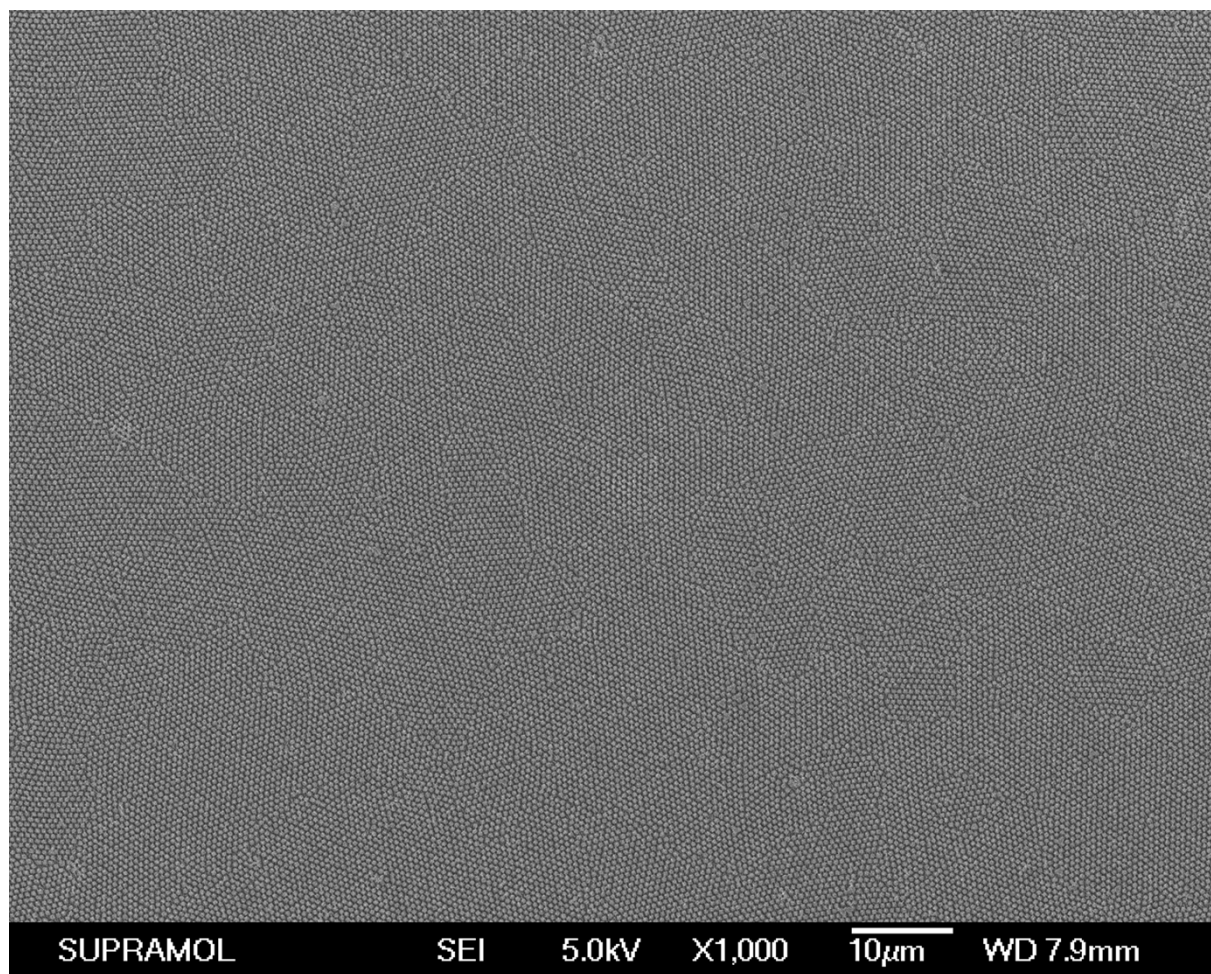

**Figure S2.** The top-view SEM image of the PET nanocone arrays over a large area, the aspect ratio of the nanocone is 6.



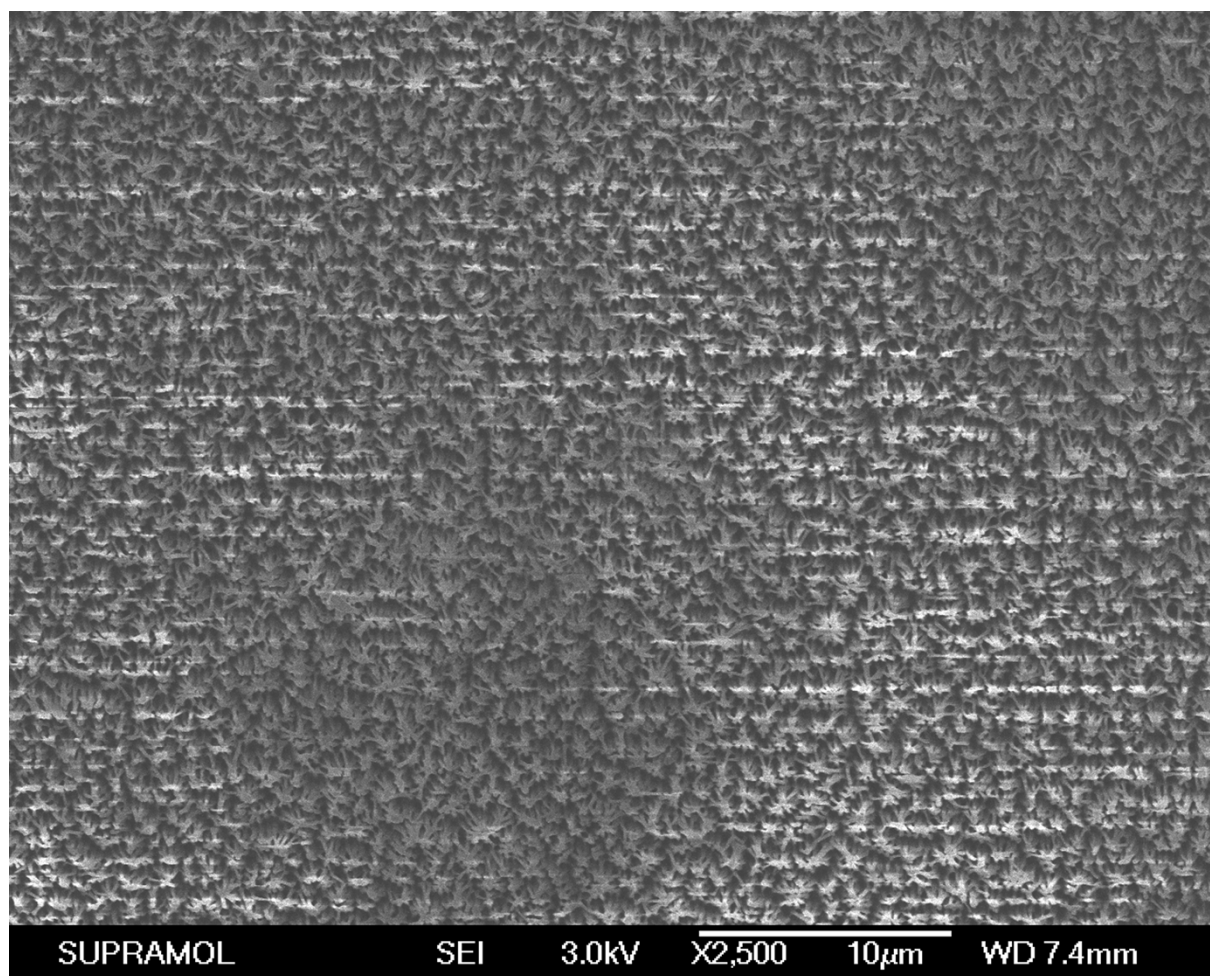

**Figure S3.** The SEM image of the PET nanocone arrays obtained after 30 min etching.

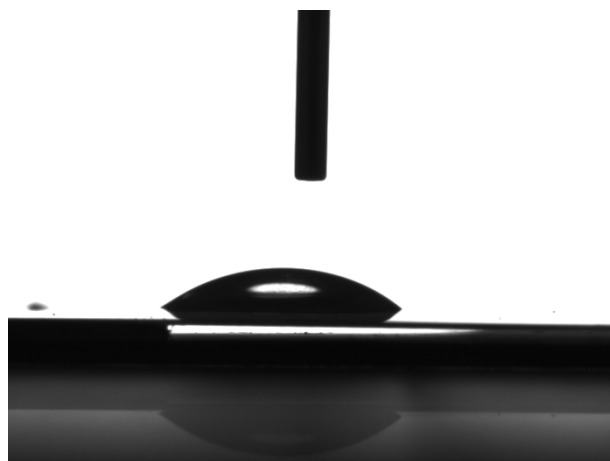

**Figure S4.** The optical image of the water droplet on the PET nanocone arrays with the aspect ratio of 6.

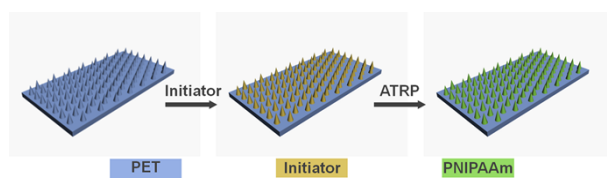

**Figure S5.** The schematic illustration of the nanocone arrays modification with PNIPAAm.

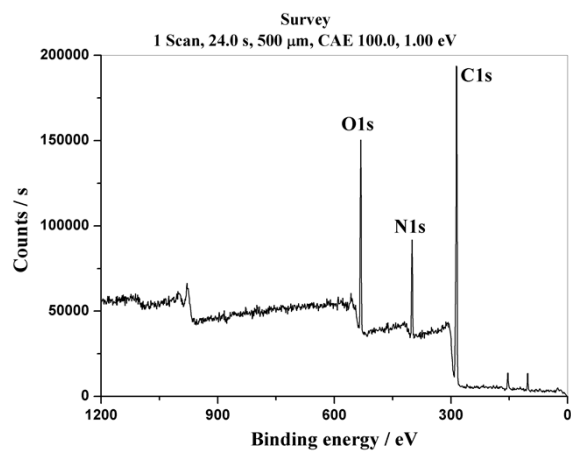

**Figure S6.** High resolution XPS spectra of the PNIPAAm modified PET nanocone arrays.
